# Supplementary material
Source: MDPI journal article supplement (https://www.mdpi.com/2311-5637/6/1/26)
Supplement: s1 [file s1]

## Supplementary materials

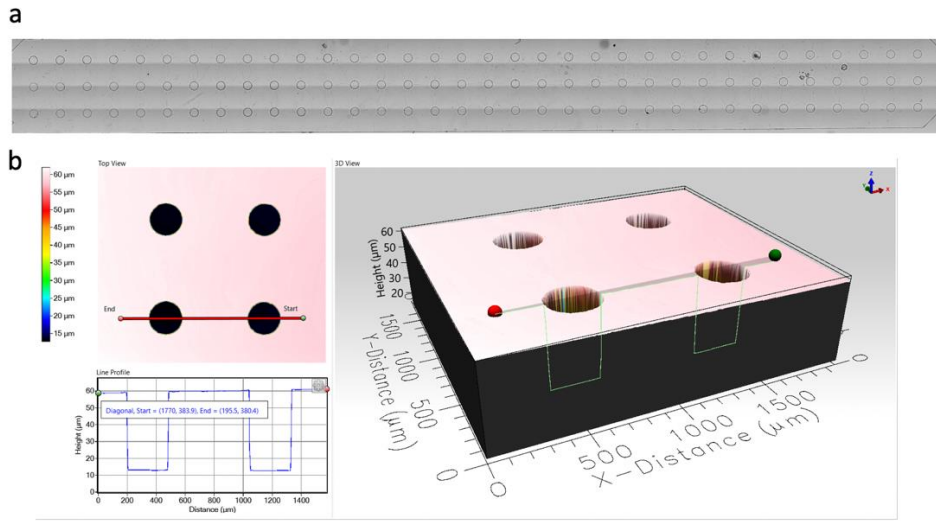

**Figure S1.** Construction of the SU-8 microwell array on the glass substrate. **(a)** Microwell array of 34 x 3 wells constructed in the resin SU-8 using UV photolithography. **(b)** The microwells have a diameter of 300 μm and a depth of 50 μm.

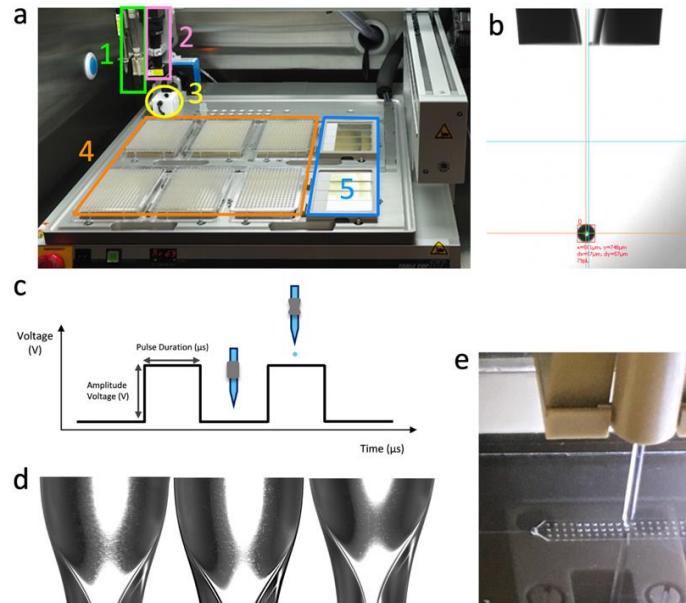

**Figure S2.** The robotic piezo dispenser. **(a)** Robot cell printer: (1) piezo dispenser, (2) head camera, (3) wash station, (4) source plates, (5) target bottom microwell array plates. **(b)** Piezo droplet volume range of 70-80 pL (pulse duration of 15 μs, amplitude voltage of 75 V, and frequency of 50 Hz). **(c)** Pulse generation during piezoelectric dispensing. **(d)** Yeast cells in the piezo capillary tip: OD<sub>600</sub> of 0.8 (left panel), 0.5 (middle panel), and 0.2 (right panel). **(e)** Piezo dispensing into the microwells of the microfluidic chip.

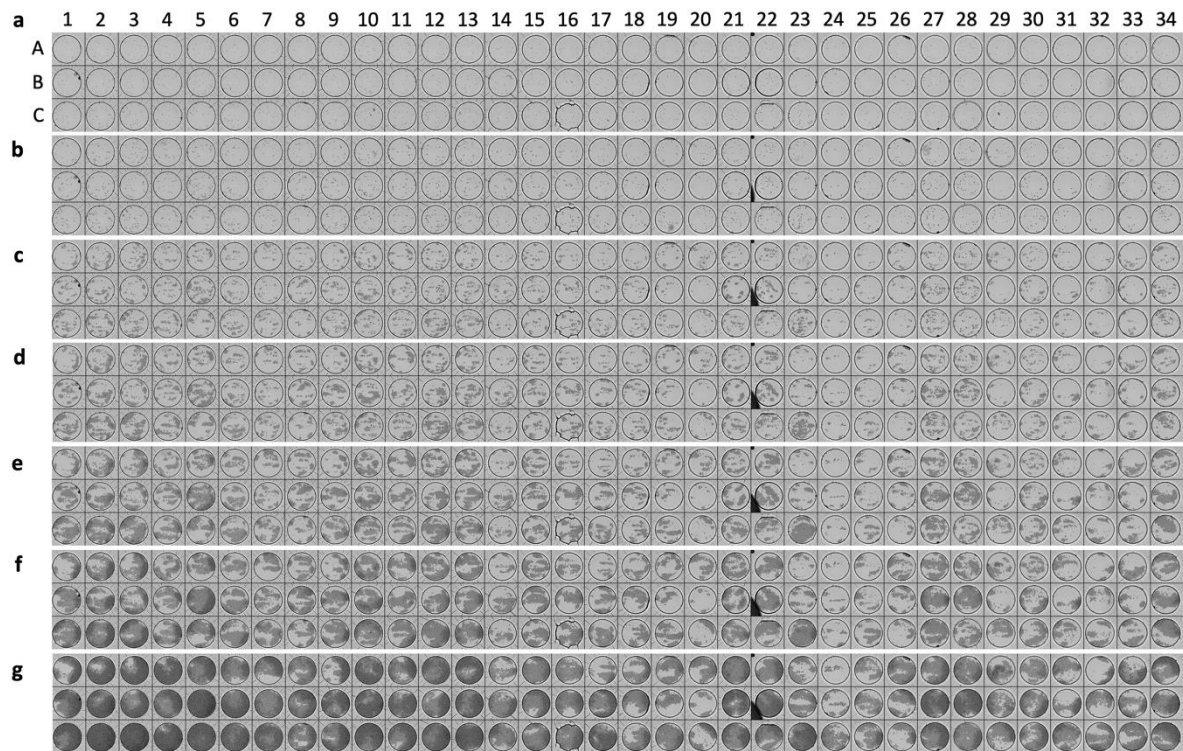

**Figure S3.** Growth of yeast cells in the microfluidic chip. Each column well (from 1 to 34) contains a different GFP yeast clone, which are present in triplicate (row well A, B and C). Growth of the cells in the microwells as a function of time: **(a)** at time point 0 h, **(b)** 4 h, **(c)** 8 h, **(d)** 10 h, **(e)** 12 h, **(f)** 14 h, **(g)** 18 h.

**Table S1.** Selected *S. cerevisiae* GFP clones that were used in the growth experiment.

| Systematic gene name | Standard gene name | Name description                   | Cell cycle phase <sup>1</sup> | Localization                                 |
|----------------------|--------------------|------------------------------------|-------------------------------|----------------------------------------------|
| YNL172W              | APC1               | Anaphase Promoting Complex subunit | M                             | Cytoplasm, nucleus, spindle pole             |
| YDR118W              | APC4               | Anaphase Promoting Complex         | M                             | Cytoplasm, nucleus                           |
| YBR200W              | BEM1               | Bud EMergence                      | S/G2                          | Bud neck, cell periphery, bud                |
| YNL271C              | BNI1               | Bud Neck Involved                  | G1/S/G2                       | Bud neck, cytoplasm                          |
| YBL085W              | BOI1               | Bem1 (One) Interacting protein     | G1/S/G2                       | Bud neck, cytoplasm, cell periphery, bud     |
| YER114C              | BOI2               | Bem1 (One) Interacting protein     | G1/S/G2                       | Bud neck, cytoplasm, punctate composite, bud |
| YKL092C              | BUD2               | BUD site selection                 | G1                            | Bud neck, cytoplasm, cell periphery          |
| YCL014W              | BUD3               | BUD site selection                 | M                             | Bud neck                                     |
| YJL194W              | CDC6               | Cell Division Cycle                | G1/S                          | Cytoplasm, nucleus                           |
| YDL017W              | CDC7               | Cell Division Cycle                | G1/S                          | Cytoplasm, nucleus                           |
| YDL164C              | CDC9               | Cell Division Cycle                | S/G2                          | Mitochondrion, nucleus                       |
| YCR002C              | CDC10              | Cell Division Cycle                | S/G2/M                        | Bud neck, cell periphery                     |
| YJR076C              | CDC11              | Cell Division Cycle                | M                             | Bud neck, cell periphery                     |
| YFR028C              | CDC14              | Cell Division Cycle                | M                             | Nucleus, nucleolus                           |

|         |                 |                                  |      |                                        |
|---------|-----------------|----------------------------------|------|----------------------------------------|
| YAR019C | CDC15           | Cell Division Cycle              | M    | Spindle pole                           |
| YKL022C | CDC16           | Cell Division Cycle              | M    | Nucleus                                |
| YHR166C | CDC23           | Cell Division Cycle              | M    | Nucleus                                |
| YAL041W | CDC24           | Cell Division Cycle              | G1/S | Cytoplasm, nucleus                     |
| YBL084C | CDC27           | Cell Division Cycle              | M    | Cytoplasm, nucleus                     |
| YBR160W | CDC28           | Cell Division Cycle              | G1   | Cytoplasm, nucleus                     |
| YCR093W | CDC39           | Cell Division Cycle              | G1   | Cytoplasm                              |
| YBR202W | MCM7<br>(CDC47) | MiniChromosome<br>Maintenance    | G1/S | Cytoplasm, nucleus                     |
| YDL132W | CDC53           | Cell Division Cycle              | G1/S | Cytoplasm, nucleus                     |
| YNL298W | CLA4            | CLn Activity dependant           | S/G2 | Cytoplasm, bud                         |
| YGR108W | CLB1            | CycLin B                         | G2/M | Nucleus                                |
| YMR199W | CLN1            | CycLiN                           | S/G2 | Cytoplasm, nucleus                     |
| YNL068C | FKH2            | ForK head Homolog                | G2/M | Nucleus                                |
| YOR372C | NDD1            | Nuclear Division Defective       | G2   | Cytoplasm, nucleus                     |
| YDL102W | POL3<br>(CDC2)  | POLymerase                       | S/G2 | Nucleus                                |
| YOR127W | RGA1            | Rho GTPase Activating<br>Protein | G2/M | Bud neck, cytoplasm, cell<br>periphery |
| YDL225W | SHS1            | Seventh Homolog of Septin        | M    | Bud neck, cell periphery               |
| YER111C | SWI4            | SWItching deficient              | G1   | Cytoplasm, nucleus                     |
| YDR146C | SWI5            | SWItching deficient              | G1   | Cytoplasm, nucleus                     |
| YNL197C | WHI3            | WHIskey                          | G1   | Cytoplasm                              |

<sup>1</sup> [66–71]
